# Supplementary material for: The Genome of Winter Moth (Operophtera brumata) Provides a Genomic Perspective on Sexual Dimorphism and Phenology
Source: PubMed Central journal article supplement (PMC4558862; doi:10.1093/gbe/evv145), 2015-07-29
Supplement: supp_evv145_Supplementary_file_1.pdf [file supp_evv145_Supplementary_file_1.pdf]

## **Section S1: Sequencing strategy**

### DNA extraction

A single adult winter moth female was used for the DNA extraction. The sample was collected on an oak tree in a forest in the Netherlands in December 2012 and stored in ethanol at -80 °C until the DNA extraction. Total DNA from the wintermoth was extracted using the DNeasy Blood & Tissue Kit (50) (Qiagen, catalog number 69504). With a modification in step 2, the sample was lysed overnight at 56 °C, followed by RNA treatment (2 min at room temperature with 4 µL of RNase A (100mg/µL)). To clean the DNA, we performed an ethanol precipitation with 8µL 5M NaCl on 400 µL DNA and 200 µL 100% ethanol (ice-cold). We inverted 3-5 times to mix, centrifuged at 10,000 x g for 5 minutes at room temperature, and decanted all liquid. Residual ethanol was removed by air drying. Precipitated DNA was resuspended in 100 µL buffer AE. The DNA concentration was measured with the nanodrop2000 (ThermoScientific).

### Overlapping library preparation and sequencing

Approximately 750 ng was sheared in a 120 µL volume using a Covaris E210 device. End repair was performed in a 200 µL total volume for 30 minutes at 30°C in a water bath then subjected to purification using AmpureXP beads (Agencourt) with 15 µL elution volume. A-tailing was performed for 30 minutes at 37°C followed by barcoded Adapter ligation for 10 minutes at 30°C, both incubations done in a thermocycler. Adapter Ligated DNA fragments were purified using AmpureXP with 20 µL elution buffer and size selected using two slots on a 2% Agarose dye free gel (blue pippin, Sage Science). One fraction collection was done using a tight selection protocol (585 bp target, incl. 120nt of adapter sequence), whereas the second fraction collection was done using a narrow selection protocol (535 to 585 bp range, incl. 120nt of adapter sequence). Size selected fragments were Ampure XP purified and eluted in 20 µL prior to PCR amplification using 10 cycles and final library Ampure XP purification, all according to manufacturer's protocol (Illumina LT DNA sample prep guide). Libraries were quantified by Qubit fluorescence and library fragment size was analyzed by Bioanalyzer High Sensitivity DNA assay.

The two different barcoded libraries were equimolar pooled for clustering and sequencing on an Illumina MiSeq instrument using two MiSeq V2 flowcells and 2\*250 cycles for Paired End sequencing plus 7 cycles for the indexing reads. De-multiplexing of resulting data was carried out using Casava 1.8 software.

### Mate Pair library preparation and sequencing

Mate Pair libraries were made according to Nextera Mate Pair sample preparation Guide (Illumina) with few adaptations. Approximately 3 µg DNA was used for tagmentation in a 400 µL volume at 55°C for 30 minutes. Tagmented DNA was purified using a Zymoclean purification column and eluted in 30 µL elution buffer. Strand displacement of tagmented DNA was done for 30 minutes at room temperature. DNA was then purified using AmpureXP beads (Agencourt). Resulting yield and fragment size was analyzed using Qubit fluorescence quantification (Life Technologies) and Bioanalyzer12000 DNA chip (Agilent technologies) respectively. Approximately 750 ng tagmented repaired DNA was loaded on a 0.6% Megabase agarose gel (Bio-rad) with SYBR safe (Life Technologies) staining. After electrophoresis for 3 hours at 100 Volt, a clear smear of 1 to 9 kb DNA fragments was visible with obvious higher concentration of molecules within the shorter half. Three DNA fractions were isolated from gel, i.e. 1 to 2 kb, 3 kb and 4 to 5 kb. DNA was recovered from gel slices using Large fragment DNA recovery kit (Zymo). Of recovered fractions respectively 75, 35 and 15 ng DNA molecules was circularized for 18 hours at 30°C in a water bath, directly followed by exonuclease treatment at 37°C and inactivation at 70°C both for 30 minutes using a water bath. Remaining circularized DNA molecules were sheared using a Covaris E210 focused ultrasonicator to approximately 500 bp target size. Sheared fragments containing a biotinylated circularization adapter were enriched using M280 streptavidin dynabeads (Life technologies), followed by standard end

repair, A-tailing and barcoded adapter ligation according to manufacturer's protocol (Illumina) using a 2720 thermocycler (Life technologies) for all incubation steps. Adapter ligated fragments were then amplified using 15 PCR cycles, purified twice with ampureXP beads and resuspended in 20  $\mu$ L elution buffer. The final libraries were quantified by Qubit and Bioanalyzer High Sensitivity DNA assay.

Barcoded Mate Pair libraries were equimolar pooled for clustering on one lane of a Illumina Paired End flowcell using a cBot. Sequencing was done on a Illumina HiSeq2000 instrument using 101, 7, 101 flow cycles for forward, index and reverse reads. De-multiplexing of resulting data was carried out using Casava 1.8 software.

## **Section S2: HaploMerger**

Initially, the total assembly size (672 Mb) exceeded the genome size estimate of 645 Mb. A likely explanation is that highly heterozygous homologous chromosomal regions are split up in separate contigs during the assembly. We used HaploMerger to merge these haplotypes to produce a haploid genome assembly (Huang, et al. 2012). First, whole genome alignments with LASTZ (masked sequence) were performed using a minimum identity of 75% in order to report the alignment. Based on these alignments, overlapping contigs were identified in HaploMerger. We assumed that large contigs would be consistent with overall average genome coverage ( $\sim$ 33X), whereas smaller contigs were more likely to include duplicate haplotypes with generally half of the expected genome coverage. The total input size of the assembly was 658.3 Mb (contigs) of which 638.2 remained after the analysis. The discarded 20.1 Mb comprised of 12,243 contigs (73,861 before, 61,618 after), on average 1,642 bp per contig. The smaller contigs had generally a lower read coverage (**Figure S6**). In addition, **Figure S7** shows a large decrease in low-coverage contigs after the HaploMerger analysis, indicating that duplicate haplotype contigs were merged.

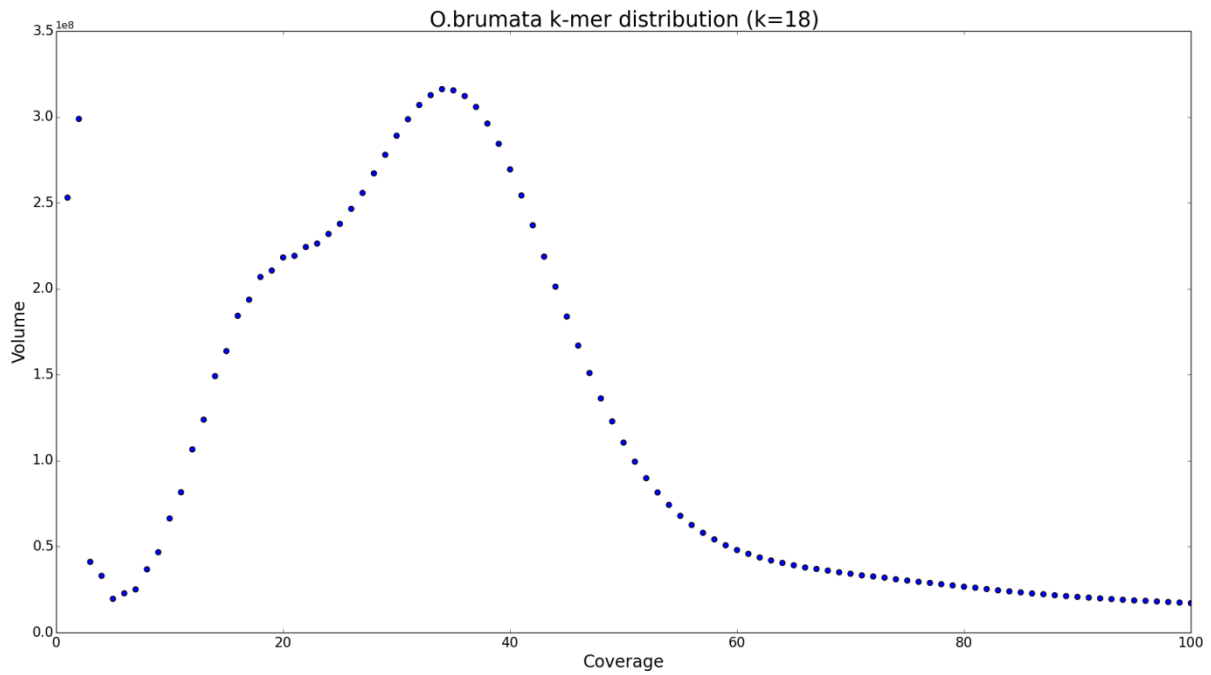

**Figure S1: K-mer distribution on pre-processed data with k=18.** The first peak in the distribution corresponds to *k*-mers derived from heterozygous regions, the second to *k*-mers derived from homozygous regions in the genome. The heterozygous peak ranges from ~6-24 resulting in a *k*-mer heterozygous ratio of 0.1289 (0.72 % base heterozygous ratio) meaning a SNP density of 7.19 per kb. We estimated the error *k*-mer cutoff and mean *k*-mer coverage as 5 and 34. The single copy region ranges from 6 – 65 approximately, ~47% of the total number of *k*-mers.

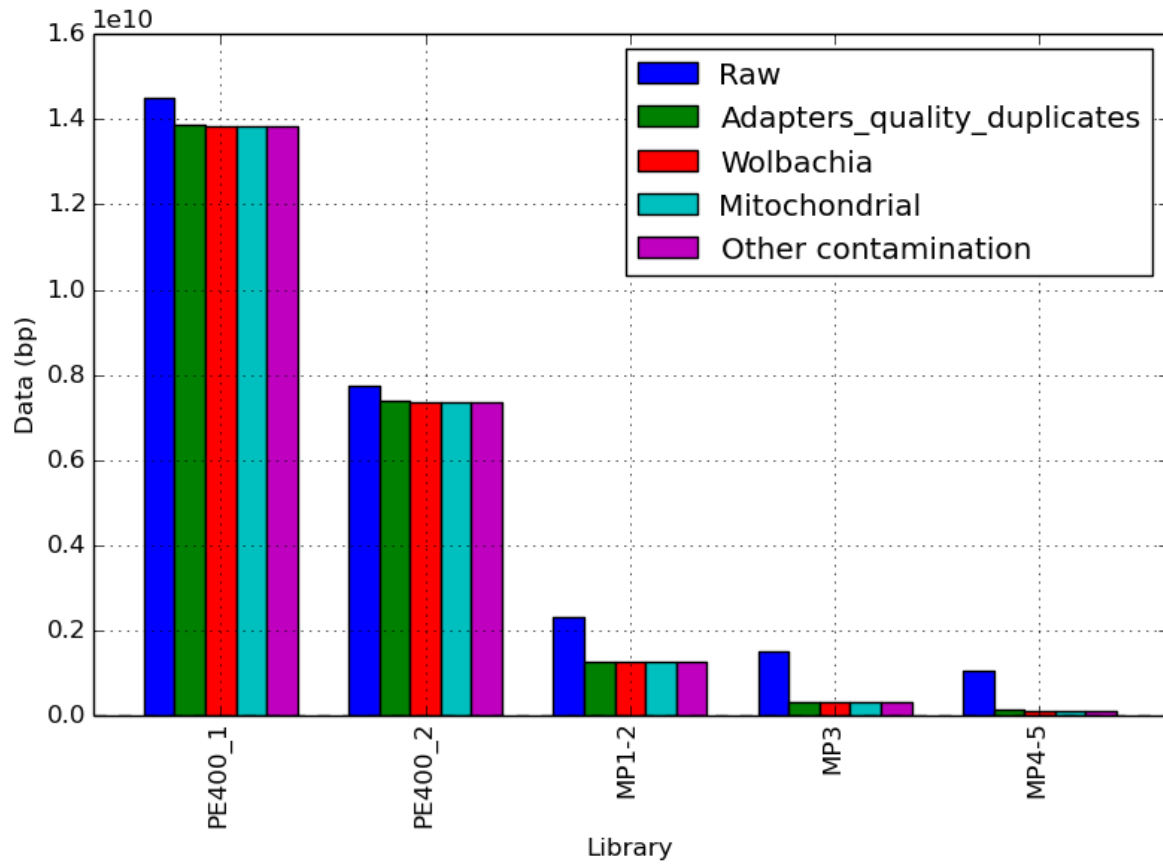

**Figure S2: Data loss in each individual pre-processing step.** Data was filtered for adapters, quality and duplicates. The majority of the data loss in the mate-pair data is due to the high level of clonal reads. Other contamination includes remaining prokaryotic reads.

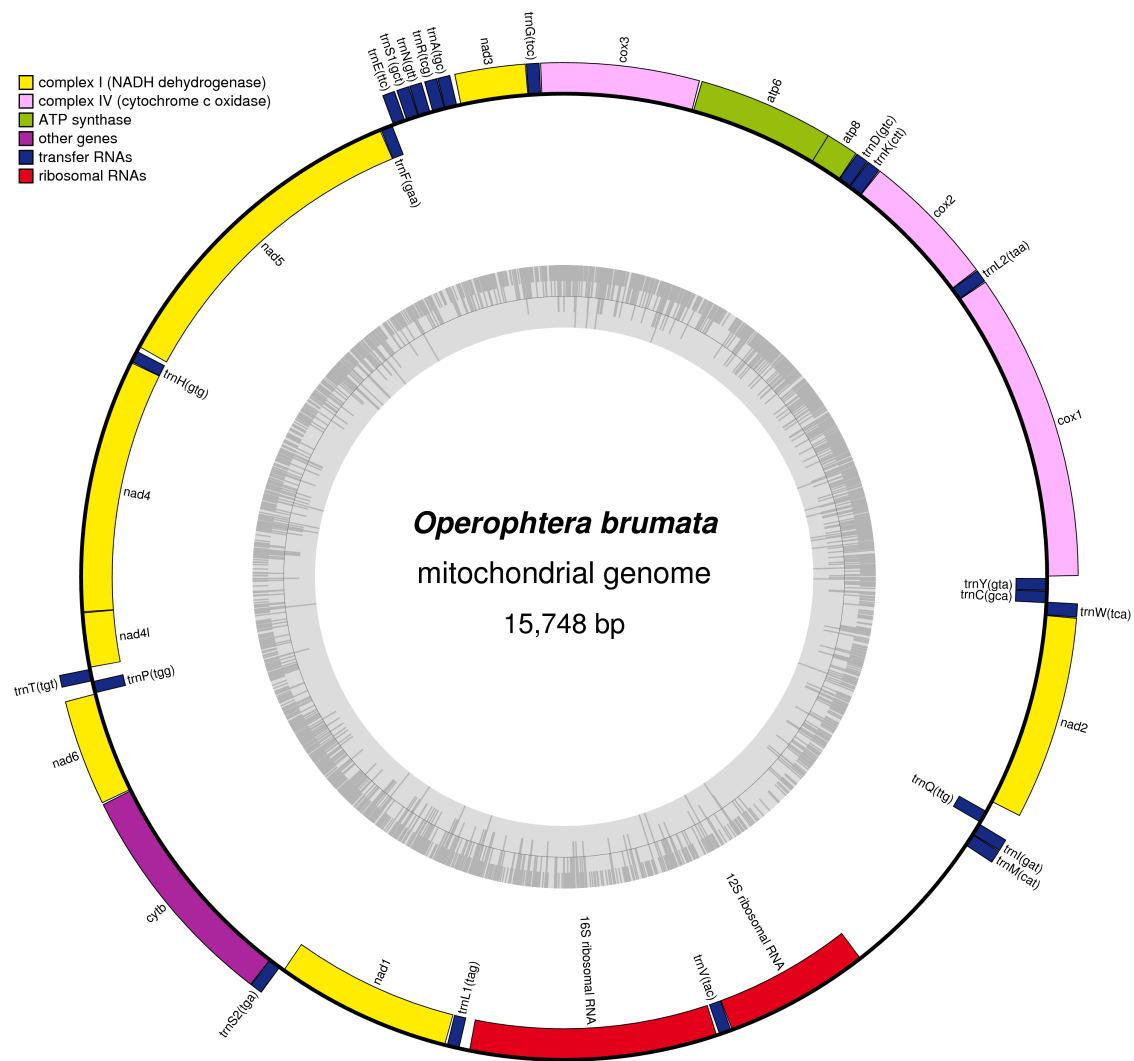

**Figure S3: *Operophtera brumata* mitochondrial genome.**

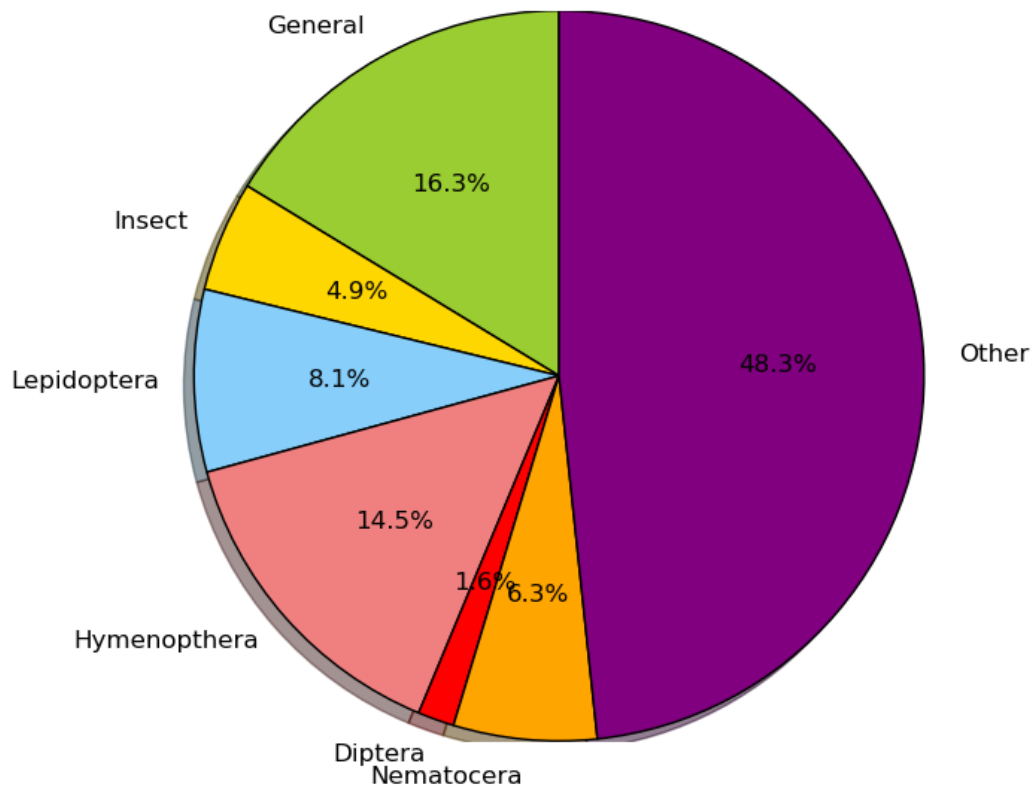

**Figure S4: Orthology assessment of twelve insect proteomes and one mammalian (outgroup).** The graph shows the classification of orthology groups formed from six Lepidoptera, two Hymenoptera, three Diptera, one Coleoptera, and one mammalian (*Homo sapiens*) proteome. Only multi-species groups are presented in this graph. We identified 3,052 general groups (i.e. containing proteins from all species), 915 insect-specific groups, 1,511 Lepidoptera-specific groups, 2,709 Hymenoptera-specific groups, 302 Diptera-specific groups, 1,188 Nematocera-specific groups, and 9,677 groups containing other combinations of species.

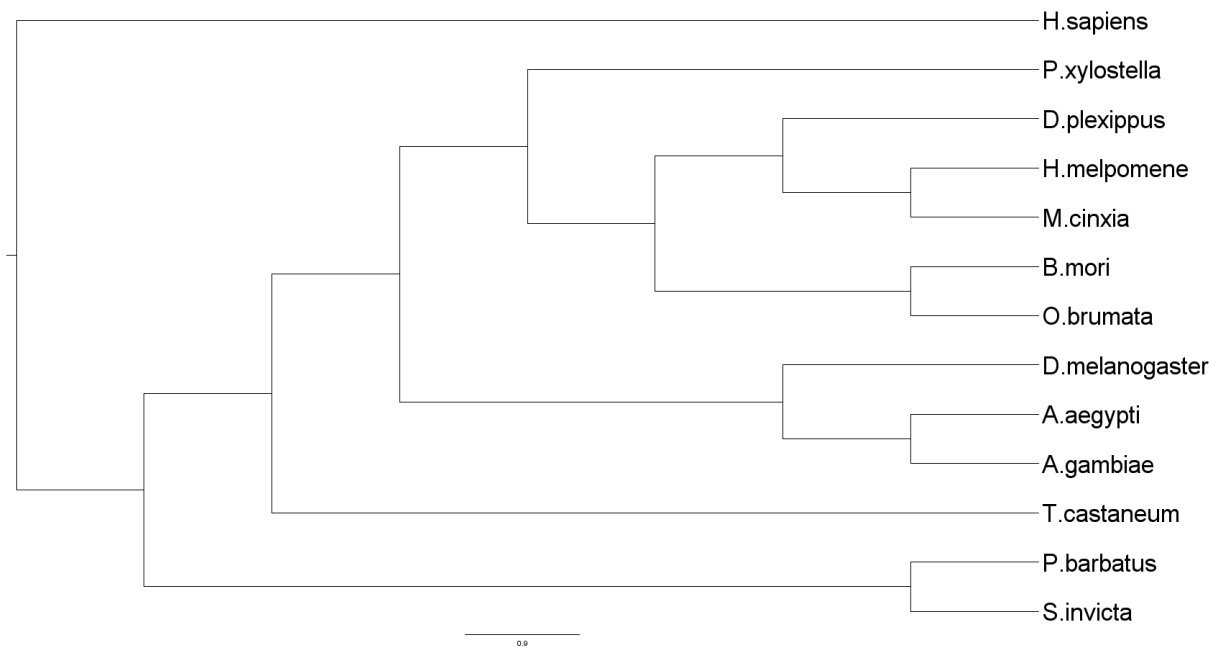

**Figure S5: Phylogenetic tree based on 526 single copy orthologs.** The tree shows *Bombyx mori* as closest sequenced relative.

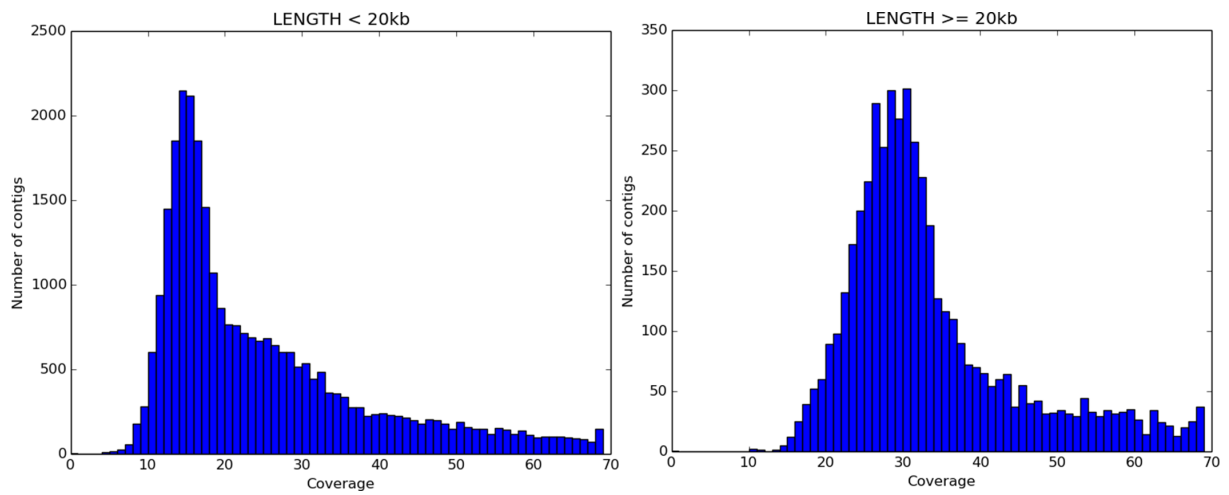

**Figure S6: Histogram with the number of contigs (y) and coverage(x) for contig length < 20kb and contig length >= 20kb.** Smaller size contigs <20kb have on average lower coverage compared to larger contigs (>=20kb).

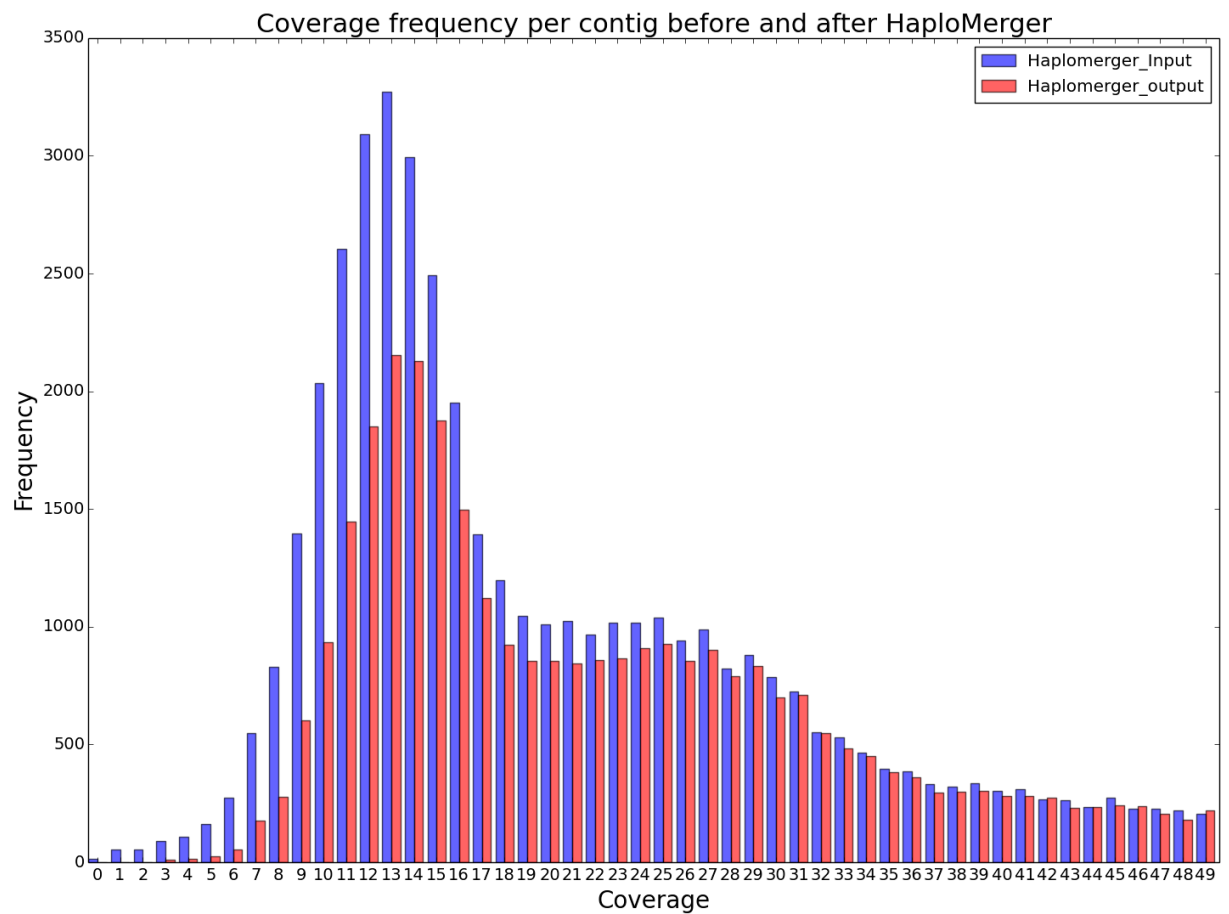

**Figure S7: Coverage frequency plot before and after HaploMerger.** Plot shows a large decrease in low-coverage contigs.



**Table S1: Genome size estimation for K=18.** In order to calculate the read coverage from the k-mer coverage we used the formula  $N = M / ((L - K + 1) / L)$  where M is the mean k-mer coverage, N is the actual read coverage, L is the mean read length and k is the k-mer size. (L-K+1) gives the number of k-mers created per read. Final genome size estimate is calculated by dividing the total read length by the read coverage. Another approach is to divide the total k-mers by the k-mer coverage given as the peak (M) in the k-mer distribution (Figure S1). This is equal to the BGI method using k-mers instead of actual bases.

|                                  |       |
|----------------------------------|-------|
| Number of reads (million)        | 108.5 |
| Mean read length                 | 213.3 |
| Number of k-mers (billion)       | 21.3  |
| M                                | 33    |
| N                                | 35.9  |
| BGI (Binghang, et al. 2012) (Mb) | 645.4 |
| K-mer / M (Mb)                   | 644.6 |

**Table S2: Variants called in *O. brumata* genome with quality >20.**

| Category            | Observation |
|---------------------|-------------|
| Total variations    | 4,209,164   |
| SNPs                | 3,720,548   |
| INDELs              | 488,616     |
| Homozygous SNPs     | 103,270     |
| Homozygous INDELs   | 14,672      |
| Heterozygous SNPs   | 3,617,278   |
| Heterozygous INDELs | 473,944     |
| VAR density (1kb)   | 6.42        |
| % Heterozygosity    | 0.64        |

**Table S3: Distribution of variants within genomic features.**

| Variation  | Count     | Length      | VAR/kb |
|------------|-----------|-------------|--------|
| Chromosome | 3,999,186 | 638,087,923 | 6.27   |
| Intergenic | 3,096,820 | 507,024,664 | 6.11   |
| Gene       | 902,366   | 131,063,259 | 6.88   |
| Exon       | 87,525    | 18,185,505  | 4.81   |
| Intron     | 814,841   | 112,877,754 | 7.22   |

**Table S4: Number of variants by functional class in coding regions of the genome**

| Class    | Count  |
|----------|--------|
| Missense | 32,917 |
| Nonsense | 849    |
| Silent   | 48,574 |

**Table S5: *O. brumata* assembly metrics.**

| <b>Metric</b>                        | <b><i>O. brumata</i> v1</b> |
|--------------------------------------|-----------------------------|
| Assembly size                        | 638,087,923                 |
| Scaffold N50                         | 2,821                       |
| Scaffold L50                         | 65,633                      |
| Scaffold N90                         | 10,536                      |
| Scaffold L90                         | 13,621                      |
| Contig N50                           | 6,070                       |
| Contig L50                           | 28,862                      |
| Contig N90                           | 24,599                      |
| Contig L90                           | 5,406                       |
| GC%                                  | 38.64                       |
| Captured gaps                        | 25,178                      |
| Maximum gap size                     | 3,796                       |
| Mean gap size                        | 536                         |
| Total gap length                     | 13,489,123                  |
| % Fragment data (properly paired)    | 94.60 (92.70)               |
| % Mate pair 1-2 kb (properly paired) | 92.23 (71.28)               |
| % Mate pair 3 kb (properly paired)   | 85.53 (59.54)               |
| % Mate pair 4-5 kb (properly paired) | 75.45 (48.44)               |

**Table S6: *O. brumata* annotated repeats.**

| <b>Class</b>           | <b>Copies</b> | <b>Length (bp)</b> | <b>Percentage of the total repeats</b> |
|------------------------|---------------|--------------------|----------------------------------------|
| <b>SINE</b>            | 258,674       | 50,559,890         | 14.80                                  |
| <b>LINE</b>            | 238,419       | 65,339,073         | 19.12                                  |
| Ambal                  | 3             | 162                | 0.00                                   |
| R1                     | 2,751         | 952,820            | 0.28                                   |
| CR1                    | 80,090        | 20,828,845         | 6.10                                   |
| Zorro                  | 1             | 88                 | 0.00                                   |
| Rex                    | 131           | 12,002             | 0.00                                   |
| Proto1                 | 3             | 153                | 0.00                                   |
| Tad1                   | 78            | 5,049              | 0.00                                   |
| Dong                   | 2,745         | 950,013            | 0.28                                   |
| R2                     | 68            | 4,883              | 0.00                                   |
| DRE                    | 11            | 631                | 0.00                                   |
| L1                     | 643           | 45,538             | 0.01                                   |
| L2                     | 47,792        | 12,371,975         | 3.62                                   |
| LOA                    | 2,534         | 847,554            | 0.25                                   |
| Proto2                 | 7,192         | 2,720,410          | 0.80                                   |
| RTE                    | 62,271        | 17,791,960         | 5.21                                   |
| Jockey                 | 9,864         | 2,874,761          | 0.84                                   |
| I                      | 1,251         | 319,596            | 0.09                                   |
| CRE                    | 19,079        | 4,785,150          | 1.40                                   |
| Penelope               | 1,903         | 826,348            | 0.24                                   |
| -                      | 9             | 1,135              | 0.00                                   |
| <b>DNA transposons</b> | 96,334        | 26,966,241         | 7.89                                   |
| Helitron               | 59,448        | 16,317,986         | 4.78                                   |
| Harbinger              | 12            | 918                | 0.00                                   |
| Kolobok                | 556           | 91,557             | 0.03                                   |
| Sola                   | 969           | 386,487            | 0.11                                   |
| Crypton                | 1,320         | 721,306            | 0.21                                   |
| Merlin                 | 18            | 2,048              | 0.00                                   |
| IS3EU                  | 15            | 3,015              | 0.00                                   |
| Zator                  | 180           | 22,052             | 0.01                                   |
| CMC                    | 3,171         | 625,739            | 0.18                                   |
| Ginger                 | 1,156         | 120,051            | 0.04                                   |
| Novosib                | 1,122         | 215,016            | 0.06                                   |
| hAT                    | 10,292        | 1,364,905          | 0.40                                   |
| -                      | 2,636         | 221,427            | 0.06                                   |
| Dada                   | 126           | 12,344             | 0.00                                   |
| MuLE                   | 132           | 53,027             | 0.02                                   |
| Academ                 | 1,607         | 825,716            | 0.24                                   |
| Maverick               | 558           | 103,390            | 0.03                                   |
| PiggyBac               | 104           | 13,666             | 0.00                                   |
| TcMar                  | 10,312        | 5,149,701          | 1.51                                   |
| PIF                    | 1,598         | 621,630            | 0.18                                   |
| MULE                   | 851           | 81,716             | 0.02                                   |
| P                      | 151           | 12,544             | 0.00                                   |
| <b>LTRs</b>            | 19,385        | 4,770,062          | 1.40                                   |
| Ginger                 | 3             | 166                | 0.00                                   |
| Gypsy                  | 5,895         | 1,409,794          | 0.41                                   |
| ERV4                   | 30            | 1,664              | 0.00                                   |
| Viper                  | 1             | 131                | 0.00                                   |
| ERV1                   | 555           | 39,131             | 0.01                                   |
| Pao                    | 2,878         | 800,701            | 0.23                                   |
| Copia                  | 2,900         | 673,765            | 0.20                                   |
| Caulimovirus           | 19            | 1,164              | 0.00                                   |
| ERV                    | 1             | 60                 | 0.00                                   |
| Copia(Xen1)            | 1             | 68                 | 0.00                                   |
| Ngaro                  | 83            | 8,774              | 0.00                                   |
| DIRS                   | 979           | 221,101            | 0.06                                   |
| ERV1                   | 46            | 3,559              | 0.00                                   |
| ERVK                   | 5,994         | 1,609,984          | 0.47                                   |

|                       |                  |                    |               |
|-----------------------|------------------|--------------------|---------------|
| -                     | 513              | 119,546            | 0.03          |
| <b>Satellite</b>      | 38,470           | 7,990,297          | 2.34          |
| <b>Simple_repeat</b>  | 456,303          | 17,605,836         | 5.15          |
| <b>Low_complexity</b> | 44,220           | 2,234,354          | 0.65          |
| <b>Unclassified</b>   | 559,269          | 166,035,894        | 48.59         |
| <b>Total</b>          | <b>1,711,074</b> | <b>341,501,647</b> | <b>100.00</b> |

---

**Table S7: Annotation data for the *O. brumata* mitochondrial genome (cox1 orientation).** For each feature the start and stop positions and length are given in bp. Strand indicates the direction of transcription (F: forward, R:reverse).

| Type   | Gene                           | Start | Stop  | Length | Strand |
|--------|--------------------------------|-------|-------|--------|--------|
| PCG    | cytochrome c oxidase subunit 1 | 3     | 1538  | 1535   | F      |
| tRNA   | tRNA-LEU2                      | 1534  | 1600  | 66     | F      |
| PCG    | cytochrome c oxidase subunit 2 | 1601  | 2281  | 680    | F      |
| tRNA   | tRNA-LYS                       | 2283  | 2353  | 70     | F      |
| tRNA   | tRNA-ASP                       | 2354  | 2420  | 66     | F      |
| PCG    | ATP synthase F0 subunit 8      | 2421  | 2588  | 167    | F      |
| PCG    | ATP synthase F0 subunit 6      | 2582  | 3259  | 677    | F      |
| PCG    | cytochrome c oxidase subunit 3 | 3266  | 4054  | 788    | F      |
| tRNA   | tRNA-GLY                       | 4057  | 4123  | 66     | F      |
| PCG    | NADH dehydrogenase subunit 3   | 4124  | 4477  | 353    | F      |
| tRNA   | tRNA-ALA                       | 4497  | 4562  | 65     | F      |
| tRNA   | tRNA-ARG                       | 4563  | 4628  | 65     | F      |
| tRNA   | tRNA-ASN                       | 4640  | 4704  | 64     | F      |
| tRNA   | tRNA-SER1                      | 4705  | 4770  | 65     | F      |
| tRNA   | tRNA-GLU                       | 4778  | 4843  | 65     | F      |
| tRNA   | tRNA-PHE                       | 4848  | 4913  | 65     | R      |
| PCG    | NADH dehydrogenase subunit 5   | 4900  | 6633  | 1733   | R      |
| tRNA   | tRNA-HIS                       | 6655  | 6719  | 64     | R      |
| PCG    | NADH dehydrogenase subunit 4   | 6721  | 8058  | 1337   | R      |
| PCG    | NADH dehydrogenase subunit 4L  | 8059  | 8349  | 290    | R      |
| tRNA   | tRNA-THR                       | 8356  | 8419  | 63     | F      |
| tRNA   | tRNA-PRO                       | 8420  | 8484  | 64     | R      |
| PCG    | NADH dehydrogenase subunit 6   | 8487  | 9017  | 530    | F      |
| PCG    | cytochrome b                   | 9022  | 10170 | 1148   | F      |
| tRNA   | tRNA-SER2                      | 10169 | 10234 | 65     | F      |
| PCG    | NADH dehydrogenase subunit 1   | 10256 | 11188 | 932    | R      |
| tRNA   | tRNA-LEU1                      | 11196 | 11263 | 67     | R      |
| rRNA   | l-rRNA                         | 11314 | 12619 | 1305   | R      |
| tRNA   | tRNA-VAL                       | 12630 | 12697 | 67     | R      |
| rRNA   | s-rRNA                         | 12699 | 13469 | 770    | R      |
| Region | Control region                 | 13469 | 14271 | 802    | -      |
| tRNA   | tRNA-MET                       | 14271 | 14338 | 67     | F      |
| tRNA   | tRNA-ILE                       | 14339 | 14403 | 64     | F      |
| tRNA   | tRNA-GLN                       | 14411 | 14479 | 68     | R      |
| PCG    | NADH dehydrogenase subunit 2   | 14535 | 15548 | 1013   | F      |
| tRNA   | tRNA-TRP                       | 15549 | 15618 | 69     | F      |
| tRNA   | tRNA-CYS                       | 15611 | 15675 | 64     | R      |
| tRNA   | tRNA-TYR                       | 15676 | 15741 | 65     | R      |

**Table S8: *O. brumata* Wolbachia endosymbiont assembly statistics.**

| <b>Metric</b> | <b>v1</b> |
|---------------|-----------|
| Size (bp)     | 1,121,046 |
| Scaffolds     | 120       |
| Contigs       | 146       |
| N50 index     | 21        |
| N50 length    | 15,631    |
| N90 index     | 76        |
| N90 length    | 4,363     |
| GC%           | 34        |

**Table S9: *O. brumata* specific cytochrome P450 genes.** No orthologs could be assigned to these P450 proteins.

| Gene         | Scaffold       | Start | Stop  | Strand | Interpro domain     |
|--------------|----------------|-------|-------|--------|---------------------|
| OBRU01_25527 | OBRU01_Sc10654 | 10674 | 12233 | -1     | IPR001128           |
| OBRU01_21616 | OBRU01_Sc06249 | 18    | 6945  | 1      | IPR001128           |
| OBRU01_12025 | OBRU01_Sc01898 | 67644 | 75244 | 1      | IPR001128           |
| OBRU01_13174 | OBRU01_Sc04285 | 454   | 1777  | -1     | IPR001128           |
| OBRU01_14097 | OBRU01_Sc02470 | 3516  | 7038  | -1     | IPR001128           |
| OBRU01_19401 | OBRU01_Sc04888 | 14146 | 33325 | 1      | IPR001128           |
| OBRU01_24529 | OBRU01_Sc09171 | 6589  | 9814  | -1     | IPR001128           |
| OBRU01_27273 | OBRU01_Sc21257 | 73    | 1620  | -1     | IPR001128           |
| OBRU01_18303 | OBRU01_Sc04189 | 19598 | 25875 | 1      | IPR001128           |
| OBRU01_19888 | OBRU01_Sc05077 | 30407 | 34079 | -1     | IPR001128           |
| OBRU01_20151 | OBRU01_Sc05287 | 15469 | 24201 | -1     | IPR001128           |
| OBRU01_11193 | OBRU01_Sc01692 | 8569  | 12261 | 1      | IPR001128           |
| OBRU01_11194 | OBRU01_Sc01692 | 12594 | 14612 | 1      | IPR001128           |
| OBRU01_27283 | OBRU01_Sc21383 | 733   | 1623  | -1     | IPR001128           |
| OBRU01_27325 | OBRU01_Sc23003 | 12    | 195   | -1     | IPR001128           |
| OBRU01_22951 | OBRU01_Sc07327 | 2509  | 15450 | 1      | IPR001128           |
| OBRU01_26755 | OBRU01_Sc15081 | 1362  | 2094  | 1      | IPR001128           |
| OBRU01_14132 | OBRU01_Sc05317 | 40657 | 50222 | -1     | IPR001128           |
| OBRU01_22021 | OBRU01_Sc06527 | 22885 | 24491 | -1     | IPR001128           |
| OBRU01_16921 | OBRU01_Sc07204 | 23630 | 28828 | -1     | IPR001128           |
| OBRU01_25447 | OBRU01_Sc11394 | 5044  | 13194 | 1      | IPR001128           |
| OBRU01_23243 | OBRU01_Sc07602 | 4594  | 10647 | 1      | IPR001128           |
| OBRU01_23244 | OBRU01_Sc07602 | 11395 | 16243 | 1      | IPR001128           |
| OBRU01_24300 | OBRU01_Sc08724 | 13734 | 16202 | 1      | IPR001128           |
| OBRU01_07004 | OBRU01_Sc01023 | 25808 | 26015 | -1     | IPR001128           |
| OBRU01_20215 | OBRU01_Sc05320 | 31416 | 33884 | 1      | IPR001128           |
| OBRU01_26433 | OBRU01_Sc13356 | 3496  | 5494  | 1      | IPR001128           |
| OBRU01_23662 | OBRU01_Sc08013 | 10464 | 17830 | -1     | IPR001128           |
| OBRU01_17185 | OBRU01_Sc03661 | 10178 | 33897 | 1      | IPR001128           |
| OBRU01_17186 | OBRU01_Sc03661 | 37551 | 40807 | -1     | IPR001128           |
| OBRU01_13762 | OBRU01_Sc02425 | 1912  | 8211  | 1      | IPR001128           |
| OBRU01_19448 | OBRU01_Sc04848 | 23957 | 37704 | -1     | IPR001128           |
| OBRU01_25551 | OBRU01_Sc10731 | 4     | 12468 | -1     | IPR001128;IPR013604 |
| OBRU01_13303 | OBRU01_Sc05628 | 23912 | 29384 | -1     | IPR001128           |
| OBRU01_19683 | OBRU01_Sc04970 | 21599 | 31533 | 1      | IPR001128           |
| OBRU01_21590 | OBRU01_Sc05666 | 19588 | 30298 | 1      | IPR001128           |
| OBRU01_20852 | OBRU01_Sc05475 | 5137  | 13522 | -1     | IPR001128           |
| OBRU01_26067 | OBRU01_Sc12028 | 6878  | 8199  | 1      | IPR001128           |
| OBRU01_23806 | OBRU01_Sc08173 | 2254  | 10463 | -1     | IPR001128           |
| OBRU01_17639 | OBRU01_Sc03843 | 45662 | 48890 | -1     | IPR001128           |
| OBRU01_07838 | OBRU01_Sc01210 | 24953 | 26899 | -1     | IPR001128           |
| OBRU01_25886 | OBRU01_Sc11574 | 1499  | 5569  | 1      | IPR001128           |
| OBRU01_04692 | OBRU01_Sc00461 | 12200 | 17438 | 1      | IPR001128           |
| OBRU01_24696 | OBRU01_Sc11196 | 9299  | 13672 | -1     | IPR001128           |
| OBRU01_07686 | OBRU01_Sc00878 | 13048 | 13399 | -1     | IPR001128           |
| OBRU01_27294 | OBRU01_Sc21712 | 65    | 1226  | 1      | IPR001128           |
| OBRU01_10196 | OBRU01_Sc02811 | 3874  | 5482  | -1     | IPR001128           |
| OBRU01_16069 | OBRU01_Sc03449 | 25350 | 55167 | 1      | IPR001128           |
| OBRU01_15108 | OBRU01_Sc02916 | 23844 | 25143 | 1      | IPR001128           |
| OBRU01_15107 | OBRU01_Sc02916 | 12991 | 13350 | 1      | IPR001128           |
| OBRU01_23424 | OBRU01_Sc07769 | 10293 | 21042 | 1      | IPR001128           |
| OBRU01_24530 | OBRU01_Sc09171 | 10054 | 16389 | 1      | IPR001128           |

**Table S10: Four rdx-like orthology groups including functional domain annotation.** Aaeg; *Aedes aegypti*, Agam; *Anopheles gambiae*. Bmor; *Bombyx mori*, Dmel; *Drosophila melanogaster*, Dple; *Danaus plexippus*, Hmel; *Heliconius melpomene*, Hsap; *Homo sapiens*, Mcin; *Melitaea cinxia*, Obru; *Operophtera brumata*, Pbar; *Pogonomyrmex barbatus*, Pxyl; *Plutella xylostella*, Sinv; *Solenopsis invicta*, Tcas; *Tribolium castaneum*.

| Species | Protein          | Group  | InterProScan domain            | Description                    |
|---------|------------------|--------|--------------------------------|--------------------------------|
| Aaeg    | AAEL005512-PA    | OG2662 | IPR011333;IPR002083; IPR008974 | BTB/POZ fold;MATH;TRAF-like    |
| Agam    | AGAP003428-PA    | OG2662 | IPR008974;IPR011333; IPR002083 | TRAF-like;BTB/POZ fold;MATH    |
| Dple    | EHJ74170         | OG2662 | IPR008974;IPR002083; IPR013069 | TRAF-like;MATH;BTB/POZ         |
| Pxyl    | Px006431.1       | OG2662 | IPR013069;IPR002083; IPR011333 | BTB/POZ;MATH;BTB/POZ fold      |
| Obru    | OBRU01_06666-RA  | OG2662 | IPR011333;IPR008974; IPR013069 | BTB/POZ fold;TRAF-like;BTB/POZ |
| Pbar    | PB12072-RA       | OG2662 | IPR008974;IPR013069; IPR011333 | TRAF-like;BTB/POZ;BTB/POZ fold |
| Dmel    | Q9VFP2           | OG2662 | IPR011333;IPR008974; IPR013069 | BTB/POZ fold;TRAF-like;BTB/POZ |
| Mcin    | MCINX009214-PA   | OG2662 | IPR013069;IPR011333            | BTB/POZ;BTB/POZ fold           |
| Hsap    | O43791           | OG2662 | IPR002083;IPR008974; IPR013069 | MATH;TRAF-like;BTB/POZ         |
| Hmel    | HMEL005347-PA    | OG2662 | IPR013069;IPR011333; IPR008974 | BTB/POZ;BTB/POZ fold;TRAF-like |
| Tcas    | TC000632-PA      | OG2662 | IPR002083;IPR008974; IPR013069 | MATH;TRAF-like;BTB/POZ         |
| Hsap    | Q6IQ16           | OG2662 | IPR008974;IPR013069; IPR002083 | TRAF-like;BTB/POZ;MATH         |
| Bmor    | BGIBMGA012495-TA | OG2662 | IPR013069;IPR008974; IPR002083 | BTB/POZ;TRAF-like;MATH         |
| Sinv    | SI2.2.0_80191    | OG2662 | IPR011333;IPR008974; IPR002083 | BTB/POZ fold;TRAF-like;MATH    |
| Obru    | OBRU01_25728-RA  | OG318  | IPR013069                      | BTB/POZ                        |
| Obru    | OBRU01_03909-RA  | OG318  | IPR011333                      | BTB/POZ fold                   |
| Obru    | OBRU01_22534-RA  | OG318  | IPR013069                      | BTB/POZ                        |
| Obru    | OBRU01_14374-RA  | OG318  | IPR013069                      | BTB/POZ                        |
| Obru    | OBRU01_00260-RA  | OG318  | IPR013069                      | BTB/POZ                        |
| Obru    | OBRU01_18171-RA  | OG318  | IPR011333                      | BTB/POZ fold                   |
| Obru    | OBRU01_18173-RA  | OG318  | IPR011333                      | BTB/POZ fold                   |
| Obru    | OBRU01_27073-RA  | OG318  | IPR011333                      | BTB/POZ fold                   |
| Obru    | OBRU01_18172-RA  | OG318  | IPR011333                      | BTB/POZ fold                   |
| Obru    | OBRU01_12465-RA  | OG318  | IPR011333                      | BTB/POZ fold                   |
| Obru    | OBRU01_10381-RA  | OG318  | IPR013069                      | BTB/POZ                        |
| Obru    | OBRU01_22403-RA  | OG318  | IPR011333                      | BTB/POZ fold                   |
| Obru    | OBRU01_14748-RA  | OG318  | IPR013069                      | BTB/POZ                        |
| Obru    | OBRU01_26232-RA  | OG318  | IPR013069                      | BTB/POZ                        |
| Obru    | OBRU01_07466-RA  | OG318  | IPR013069                      | BTB/POZ                        |
| Obru    | OBRU01_07582-RA  | OG318  | IPR011333                      | BTB/POZ fold                   |
| Obru    | OBRU01_13569-RA  | OG318  | IPR013069                      | BTB/POZ                        |
| Obru    | OBRU01_16625-RA  | OG318  | IPR011333                      | BTB/POZ fold                   |
| Obru    | OBRU01_24104-RA  | OG318  | IPR011333                      | BTB/POZ fold                   |
| Obru    | OBRU01_25504-RA  | OG318  | IPR011333                      | BTB/POZ fold                   |
| Obru    | OBRU01_18174-RA  | OG318  | IPR011333                      | BTB/POZ fold                   |
| Obru    | OBRU01_14375-RA  | OG318  | IPR011333                      | BTB/POZ fold                   |
| Obru    | OBRU01_07621-RA  | OG318  | IPR013069                      | BTB/POZ                        |
| Obru    | OBRU01_24847-RA  | OG318  | IPR011333                      | BTB/POZ fold                   |
| Obru    | OBRU01_12195-RA  | OG318  | IPR013069                      | BTB/POZ                        |
| Obru    | OBRU01_06308-RA  | OG6733 | IPR013069                      | BTB/POZ                        |
| Agam    | AGAP009864-PA    | OG6733 | -                              | -                              |
| Agam    | AGAP012814-PA    | OG6733 | -                              | -                              |
| Aaeg    | AAEL013356-PA    | OG6733 | -                              | -                              |
| Bmor    | BGIBMGA002980-TA | OG6733 | -                              | -                              |
| Dmel    | A8DYY1           | OG6733 | -                              | -                              |
| Dple    | EHJ75347         | OG6733 | -                              | -                              |



|      |                      |        |                     |                      |
|------|----------------------|--------|---------------------|----------------------|
| Hmel | HMEL012454-PA        | OG6733 | -                   | -                    |
| Mcin | MCINX004691-PA       | OG6733 | -                   | -                    |
| Obru | OBRU01_06308-RA      | OG6733 | -                   | -                    |
| Tcas | TC014112-PA          | OG6733 | -                   | -                    |
| Bmor | BGIBMGA007642-<br>TA | OG8556 | IPR013069           | BTB/POZ              |
| Mcin | MCINX001253-PA       | OG8556 | IPR011333           | BTB/POZ fold         |
| Pxyl | Px002757.1           | OG8556 | IPR013069           | BTB/POZ              |
| Obru | OBRU01_16177-RA      | OG8556 | IPR013069           | BTB/POZ              |
| Dple | EHJ73707             | OG8556 | IPR011333           | BTB/POZ fold         |
| Hmel | HMEL015438-PA        | OG8556 | IPR011333;IPR013069 | BTB/POZ fold;BTB/POZ |
| Pxyl | Px012985.1           | OG8556 | IPR013069           | BTB/POZ              |

**Table S11: Blast hits (nr) for *O. brumata* rdx-like genes from all four orthologous groups.** For each hit, the group with the lowest E-value is presented.

| Taxonomy | Order        | Species                         | Hits       | OG2662 | OG8556 | OG6733 | OG318 |
|----------|--------------|---------------------------------|------------|--------|--------|--------|-------|
| 7425     | Hymenoptera  | <i>Nasonia vitripennis</i>      | <b>105</b> | 26     | 15     | 54     | 10    |
| 30085    | Hemiptera    | <i>Lygus hesperus</i>           | <b>95</b>  | 33     | 11     | 51     | 0     |
| 69319    | Hymenoptera  | <i>Microplitis demolitor</i>    | <b>63</b>  | 8      | 14     | 39     | 2     |
| 7029     | Hemiptera    | <i>Acyrtosiphon pisum</i>       | <b>57</b>  | 5      | 4      | 24     | 24    |
| 7070     | Coleoptera   | <i>Tribolium castaneum</i>      | 31         | 5      | 16     | 10     | 0     |
| 7227     | Diptera      | <i>Drosophila melanogaster</i>  | 24         | 2      | 17     | 5      | 0     |
| 7370     | Diptera      | <i>Musca domestica</i>          | 23         | 3      | 9      | 11     | 0     |
| 7176     | Diptera      | <i>Culex quinquefasciatus</i>   | 22         | 2      | 7      | 12     | 1     |
| 13686    | Hymenoptera  | <i>Solenopsis invicta</i>       | 19         | 6      | 7      | 6      | 0     |
| 103372   | Hymenoptera  | <i>Acromyrmex echinator</i>     | 19         | 5      | 10     | 4      | 0     |
| 136037   | Isoptera     | <i>Zootermopsis nevadensis</i>  | 18         | 1      | 7      | 6      | 4     |
| 610380   | Hymenoptera  | <i>Harpegnathos saltator</i>    | 18         | 7      | 5      | 6      | 0     |
| 77166    | Coleoptera   | <i>Dendroctonus ponderosae</i>  | 16         | 1      | 11     | 4      | 0     |
| 28588    | Diptera      | <i>Bactrocera cucurbitae</i>    | 15         | 1      | 9      | 3      | 2     |
| 27457    | Diptera      | <i>Bactrocera dorsalis</i>      | 15         | 1      | 9      | 3      | 2     |
| 7462     | Hymenoptera  | <i>Apis dorsata</i>             | 14         | 3      | 8      | 3      | 0     |
| 7222     | Diptera      | <i>Drosophila grimshawi</i>     | 13         | 1      | 10     | 1      | 1     |
| 46245    | Diptera      | <i>Drosophila pseudoobscura</i> | 13         | 1      | 11     | 1      | 0     |
| 13037    | Lepidoptera  | <i>Danaus plexippus</i>         | 13         | 2      | 6      | 5      | 0     |
| 7091     | Lepidoptera  | <i>Bombyx mori</i>              | 13         | 5      | 4      | 4      | 0     |
| 7460     | Hymenoptera  | <i>Apis mellifera</i>           | 13         | 5      | 5      | 3      | 0     |
| 180454   | Diptera      | <i>Anopheles gambiae</i>        | 12         | 2      | 8      | 2      | 0     |
| 121224   | Phthiraptera | <i>Pediculus humanus</i>        | 12         | 2      | 6      | 2      | 2     |
| 7260     | Diptera      | <i>Drosophila willistoni</i>    | 11         | 1      | 6      | 3      | 1     |
| 121845   | Hemiptera    | <i>Diaphorina citri</i>         | 11         | 2      | 3      | 6      | 0     |
| 132113   | Hymenoptera  | <i>Bombus impatiens</i>         | 11         | 2      | 6      | 3      | 0     |
| 7213     | Diptera      | <i>Ceratitis capitata</i>       | 11         | 0      | 7      | 3      | 1     |
| 7217     | Diptera      | <i>Drosophila ananassae</i>     | 11         | 1      | 8      | 2      | 0     |
| 7159     | Diptera      | <i>Aedes aegypti</i>            | 11         | 1      | 8      | 2      | 0     |
| 7230     | Diptera      | <i>Drosophila mojavensis</i>    | 11         | 1      | 6      | 3      | 1     |
| 30195    | Hymenoptera  | <i>Bombus terrestris</i>        | 10         | 1      | 6      | 3      | 0     |
| 7244     | Diptera      | <i>Drosophila virilis</i>       | 10         | 1      | 6      | 2      | 1     |
| 104421   | Hymenoptera  | <i>Camponotus floridanus</i>    | 9          | 2      | 4      | 3      | 0     |
| 443821   | Hymenoptera  | <i>Cerapachys biroi</i>         | 9          | 1      | 5      | 2      | 1     |
| 143995   | Hymenoptera  | <i>Megachile rotundata</i>      | 8          | 2      | 3      | 3      | 0     |
| 43151    | Diptera      | <i>Anopheles darlingi</i>       | 8          | 1      | 5      | 2      | 0     |
| 7234     | Diptera      | <i>Drosophila persimilis</i>    | 8          | 0      | 7      | 1      | 0     |
| 7220     | Diptera      | <i>Drosophila erecta</i>        | 7          | 0      | 5      | 1      | 1     |
| 74873    | Diptera      | <i>Anopheles sinensis</i>       | 6          | 1      | 4      | 1      | 0     |
| 7240     | Diptera      | <i>Drosophila simulans</i>      | 6          | 0      | 5      | 1      | 0     |
| 7238     | Diptera      | <i>Drosophila sechellia</i>     | 6          | 0      | 4      | 1      | 1     |
| 7463     | Hymenoptera  | <i>Apis florea</i>              | 6          | 1      | 4      | 1      | 0     |
| 7245     | Diptera      | <i>Drosophila yakuba</i>        | 5          | 0      | 3      | 1      | 1     |
| 30069    | Diptera      | <i>Anopheles stephensi</i>      | 2          | 0      | 2      | 0      | 0     |
| 329032   | Hemiptera    | <i>Riptortus pedestris</i>      | 1          | 1      | 0      | 0      | 0     |
| 7229     | Diptera      | <i>Drosophila miranda</i>       | 1          | 0      | 1      | 0      | 0     |
| 36987    | Isoptera     | <i>Coptotermes formosanus</i>   | 1          | 0      | 0      | 1      | 0     |
| 7165     | Diptera      | <i>Anopheles gambiae</i>        | 1          | 0      | 1      | 0      | 0     |

**Table S12: *O. brumata* clock genes and *Bombyx mori* orthologs.** The last two columns represent the SNP density and mean coverage for the corresponding *O. brumata* scaffold.

| Gene             | <i>O. brumata</i> protein | Interpro-Scan domain identifier       | Orthology group | <i>B. mori</i> ortholog | <i>B. mori</i> locus     | SNP density | Mean coverage |
|------------------|---------------------------|---------------------------------------|-----------------|-------------------------|--------------------------|-------------|---------------|
| VRI              | OBRU01_00304              | IPR004827                             | OG6538          | BGIBMGA013421           | Chr27:4490487-4500640    | 5.2         | 34.3          |
| CYC              | OBRU01_02005              | IPR011598                             | OG1939          | BGIBMGA003870           | Chr1:22022407- 22117405  | 6.4         | 31.8          |
| PP2A             | OBRU01_02313              | IPR004843;<br>IPR029052               | OG3715          | BGIBMGA007460           | Chr3:3668244- 3689014    | 4.8         | 31.2          |
| TIM              | OBRU01_05602              | IPR006906                             | OG6006          | BGIBMGA006226           | Chr4:8449049- 8472466    | 5.4         | 35.2          |
| JET              | OBRU01_04413              | -                                     | OG6179          | BGIBMGA007348           | Chr3:1652897- 1656428    | 1.2         | 39.4          |
| PDP1             | OBRU01_06761              | IPR004827                             | OG5114          | BGIBMGA003874           | Chr1: 22204769- 22297686 | 5.4         | 28.1          |
| PER              | OBRU01_08044              | IPR000014;<br>IPR013767               | OG5596          | BGIBMGA000486           | Chr1:12956618- 13004501  | 1.7         | 20.4          |
| DBT              | OBRU01_11147              | IPR011009;<br>IPR000719               | OG6809          | BGIBMGA007304           | Chr17: 7197366- 7208585  | 0.4         | 31.6          |
| CRY2             | OBRU01_11388              | IPR005101;<br>IPR006050               | OG421           | BGIBMGA007789           | Chr15:9097906- 9117412   | 3.4         | 26.0          |
| CLK              | OBRU01_11444              | IPR000014                             | OG2652          | BGIBMGA000498           | Chr1:6617152-6658312     | 0.1         | 21.3          |
| SLIMB            | OBRU01_20985              | IPR017986;<br>IPR001680;<br>IPR022048 | OG2886          | BGIBMGA012206           | Chr24: 16923175-16931013 | 4.3         | 30.8          |
| Casein kinase II | OBRU01_24003              | IPR000719;<br>IPR011009               | OG2514          | BGIBMGA003474           | Chr5:11364679- 11369751  | 0.9         | 42.5          |
| CRY              | OBRU01_25463              | IPR006050                             | OG7553          | BGIBMGA007140           | Chr17:14889290- 14890272 | 3.5         | 19.0          |

**Table S13: Orthology.** Orthology assessment of twelve insect and one mammalian species. In total, 22,895 orthologous groups were created with 18,726 multi-species groups and 4,133 single species groups.

| <b>Organism</b>        | <b>Order</b> | <b>Superfamily</b> | <b>#Proteins</b> | <b># groups with<br/><i>O. brumata</i></b> | <b># proteins in<br/><i>O. brumata</i> groups</b> |
|------------------------|--------------|--------------------|------------------|--------------------------------------------|---------------------------------------------------|
| <i>O. brumata</i>      | Lepidoptera  | Geometroidea       | 16,912           | -                                          | -                                                 |
| <i>B. mori</i>         | Lepidoptera  | Bombycoidea        | 14,623           | 8,780                                      | 10,206                                            |
| <i>D. plexippus</i>    | Lepidoptera  | Papilionoidea      | 16,254           | 9,021                                      | 10,925                                            |
| <i>H. melpomene</i>    | Lepidoptera  | Papilionoidea      | 12,829           | 8,395                                      | 9,604                                             |
| <i>M. cinxia</i>       | Lepidoptera  | Papilionoidea      | 16,674           | 8,418                                      | 9,840                                             |
| <i>P. xylostella</i>   | Lepidoptera  | Yponomeutoidea     | 18,073           | 7,541                                      | 11,029                                            |
| <i>D. melanogaster</i> | Diptera      | Ephydroidea        | 13,907           | 6,148                                      | 7,444                                             |
| <i>A. aegypti</i>      | Diptera      | Culicoidea         | 15,696           | 6,232                                      | 7,995                                             |
| <i>A. gambiae</i>      | Diptera      | Culicoidea         | 12,828           | 6,239                                      | 7,154                                             |
| <i>P. barbatus</i>     | Hymenoptera  | Vespoidea          | 17,189           | 6,436                                      | 7,477                                             |
| <i>S. invicta</i>      | Hymenoptera  | Vespoidea          | 16,522           | 5,839                                      | 6,738                                             |
| <i>T. castaneum</i>    | Coleoptera   | Tenebrionoidea     | 16,526           | 6,698                                      | 8,267                                             |
| <i>H. sapiens</i>      | Primates     | Hominidae          | 20,249           | 5,181                                      | 8,699                                             |

## References

Binghang L, et al. 2012. Estimation of genomic characteristics by analyzing k-mer frequency in de novo genome projects. arXiv:1308.2012 [q-bio.GN].

Huang SF, et al. 2012. HaploMerger: Reconstructing allelic relationships for polymorphic diploid genome assemblies. *Genome Research* 22: 1581-1588. doi: DOI 10.1101/gr.133652.111
